# Supplementary material for: Electrocatalytic Activity of Au/tio2 Nanocomposites in Oxygen Electroreduction Reaction
Source: Research Square preprint supplement (doi:10.21203/rs.3.rs-8246742/v1), 2026-01-12
Supplement: Supplementary file 1 [file e6cd715ab852067d6d84ac90.docx]

**Supporting Information**

|  |
| --- |
|  |
| Fig. S1. TEM images of TiO2 nanoparticles prepared via sol-gel method |

|  |
| --- |
| Fig. S2. TEM images of Au NPS stabilized with citrate |

| 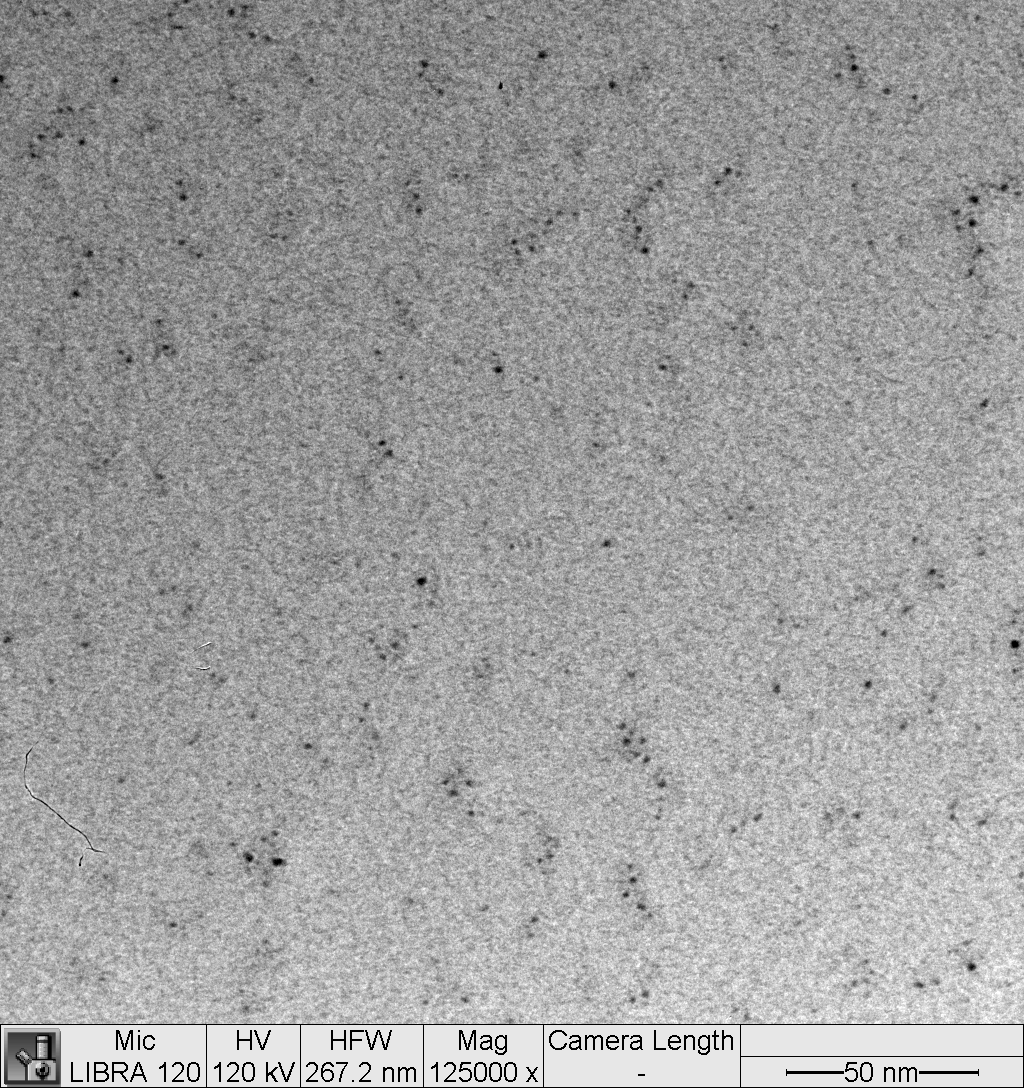 |
| --- |
| Fig. S3. TEM images of Au NPS stabilized by 5-(2-mercaptoethyl)tetrazole |
